# Supplementary material for: TGFβ2-induced senescence during early inner ear development
Source: PubMed Central journal article supplement (PMC6459823; doi:10.1038/s41598-019-42040-0), 2019-04-11
Supplement: 41598_2019_42040_MOESM1_ESM.pdf [file 41598_2019_42040_MOESM1_ESM.pdf]

## TGF $\beta$ 2-induced senescence during early inner ear development

Alejandro Gibaja<sup>1\*</sup>, María R. Aburto<sup>1\*</sup>, Sara Pulido<sup>1,2</sup>, Manuel Collado<sup>3</sup>, Juan M. Hurlé<sup>4</sup>,  
Isabel Varela-Nieto<sup>1,4,5#</sup> and Marta Magariños<sup>1,2,6#</sup>

<sup>1</sup> "Alberto Sols" Biomedical Research Institute (CSIC-UAM), Madrid, Spain.

<sup>2</sup> CIBERER, Institute of Health Carlos III, Madrid, Spain.

<sup>3</sup> Instituto de Investigación Sanitaria de Santiago de Compostela, Santiago de Compostela, Spain.

<sup>4</sup> Departamento de Anatomía y Biología Celular and IDIVAL, Universidad de Cantabria. Santander, Spain.

<sup>5</sup> IdiPAZ, La Paz Hospital Institute for Health Research, Madrid, Spain.

<sup>6</sup> Department of Biology, Autonomous University of Madrid, Madrid, Spain.

\* Equal contribution

# Equal senior contribution and corresponding authors

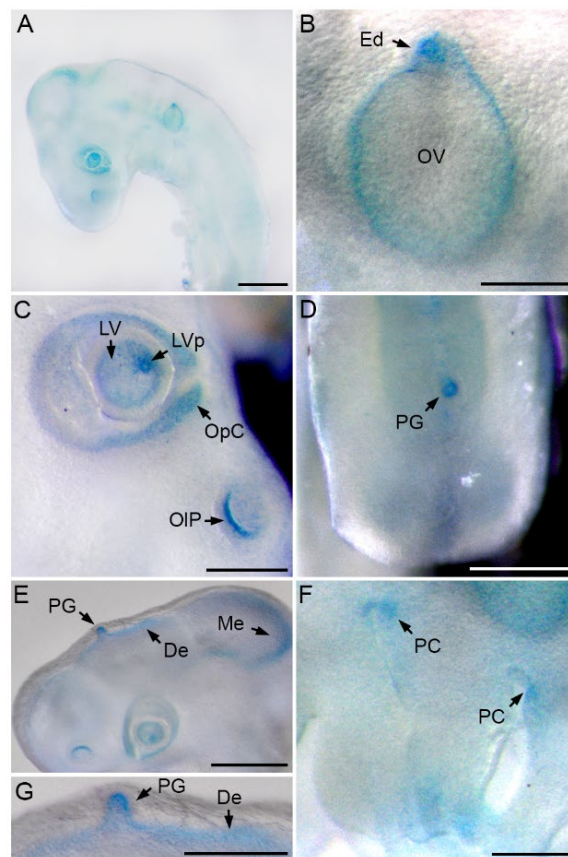

**Supplementary Information Figure S1. Senescence during the early development of the chicken embryo.** Senescence was visualised in specific regions of chicken embryos by SA $\beta$ G staining. **A)** Overview of SA $\beta$ G staining in the HH20 embryo; **B)** Close up the otic vesicle from an HH20 embryo showing senescence in the otic epithelium particularly intense at the endolymphatic duct; **C)** SA $\beta$ G staining in the optic cup, in the lens vesicle and in the olfactory placode at HH17; **D)** SA $\beta$ G staining in the pineal gland of an HH17 stage embryo; **E)** Overview of the head of an HH17 embryo showing senescence in the diencephalon, midbrain, pineal gland; **F)** SA $\beta$ G staining in the dorsal region of the pharyngeal clefts; **G)** Higher magnification of the epiphysis and diencephalon in E showing SA $\beta$ G staining. Abbreviations: De, diencephalon; Ed, endolymphatic duct; LV, lens vesicle; LVp, lens vesicle pore; Me, midbrain; OIP, olfactory placode; OpC, optic cup; PC, pharyngeal cleft; PG, pineal gland; OV, otic vesicle. Scale bars: 500

$\mu\text{m}$  (A, E); 250  $\mu\text{m}$  (C, D, F, G); 125  $\mu\text{m}$  (B). Representative microphotographs are shown of at least n=2-3 stained embryos.

## TGFβ2 -induced senescence during early inner ear development

Alejandro Gibaja<sup>1\*</sup>, María R. Aburto<sup>1\*</sup>, Sara Pulido<sup>1,2</sup>, Manuel Collado<sup>3</sup>, Juan M. Hurlé<sup>4</sup>,  
Isabel Varela-Nieto<sup>1,4,5#</sup> and Marta Magariños<sup>1,2,6#</sup>

<sup>1</sup> "Alberto Sols" Biomedical Research Institute (CSIC-UAM), Madrid, Spain.

<sup>2</sup> CIBERER, Institute of Health Carlos III, Madrid, Spain.

<sup>3</sup> Instituto de Investigación Sanitaria de Santiago de Compostela, Santiago de Compostela, Spain.

<sup>4</sup> Departamento de Anatomía y Biología Celular and IDIVAL, Universidad de Cantabria. Santander, Spain.

<sup>5</sup> IdiPAZ, La Paz Hospital Institute for Health Research, Madrid, Spain.

<sup>6</sup> Department of Biology, Autonomous University of Madrid, Madrid, Spain.

\* Equal contribution

# Equal senior contribution and corresponding authors

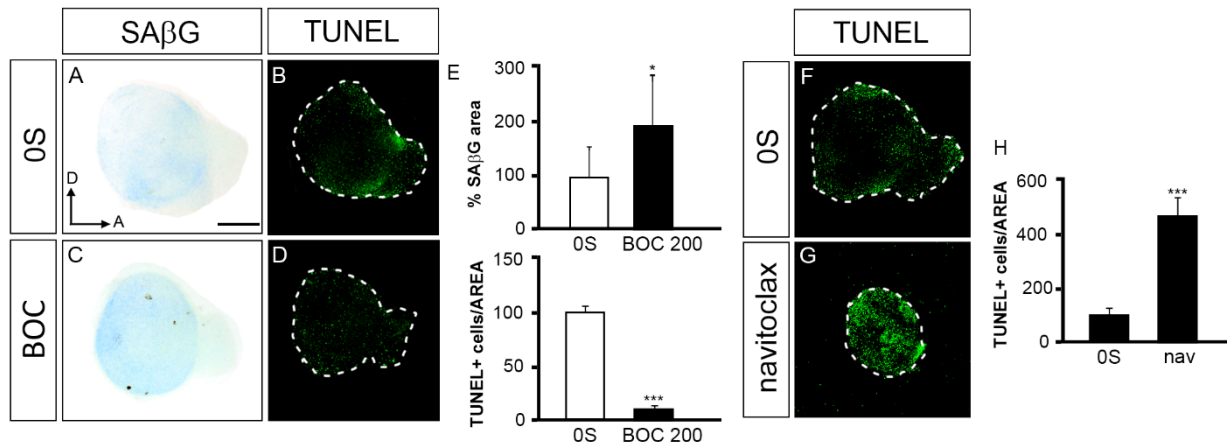

### Supplementary Information Figure S2. Senescence and apoptosis in explanted chicken otic vesicles.

Otic vesicles were isolated from HH18 chicken embryos and incubated ex vivo for 20 h in serum-free culture medium without additives (0S, A-B,F), in the presence of the pan-caspase inhibitor BOC (200 μM; C-D) or in the presence of the senolytic navitoclax (1 μM; G). SAβG staining was increased by 1.9-fold in BOC-treated otic vesicles (A,C, quantification in E), whilst apoptotic cell death visualized by TUNEL staining (green) was reduced by 0.9-fold (B,D, quantification in E). Elimination of senescent cells by navitoclax reduced SAβG staining (Figure 2 A,E, quantification in M) and increased apoptosis (F,G, quantification in H). SAβG staining is represented with respect to the total otic vesicle area. TUNEL-positive cells were measured from compiled confocal microscopy projections and normalized to the 0S condition. At least n=4 otic vesicles per condition were studied. Data are shown as mean ± SEM. \*p<0.05, \*\*\*p<0.001 vs 0S. of otic vesicles. Orientation: A, anterior; D, dorsal. Scale bars, 150 μm.

## TGFβ2 -induced senescence during early inner ear development

Alejandro Gibaja<sup>1\*</sup>, María R. Aburto<sup>1\*</sup>, Sara Pulido<sup>1,2</sup>, Manuel Collado<sup>3</sup>, Juan M. Hurlé<sup>4</sup>,  
Isabel Varela-Nieto<sup>1,4,5#</sup> and Marta Magariños<sup>1,2,6#</sup>

<sup>1</sup> "Alberto Sols" Biomedical Research Institute (CSIC-UAM), Madrid, Spain.

<sup>2</sup> CIBERER, Institute of Health Carlos III, Madrid, Spain.

<sup>3</sup> Instituto de Investigación Sanitaria de Santiago de Compostela, Santiago de Compostela, Spain.

<sup>4</sup> Departamento de Anatomía y Biología Celular and IDIVAL, Universidad de Cantabria. Santander, Spain.

<sup>5</sup> IdiPAZ, La Paz Hospital Institute for Health Research, Madrid, Spain.

<sup>6</sup> Department of Biology, Autonomous University of Madrid, Madrid, Spain.

\* Equal contribution

# Equal senior contribution and corresponding authors

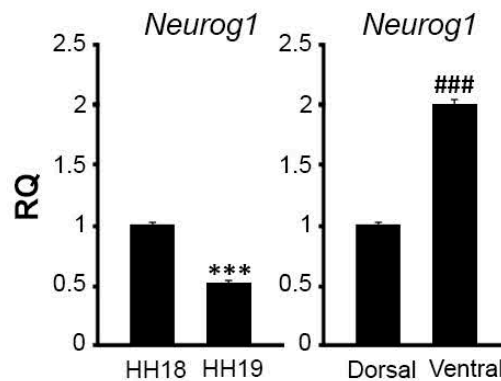

**Supplementary Information Figure S3. *Neurog1* as a biomarker of early ventral region.** *Neurog1* mRNA expression levels were measured by RT-qPCR in non-cultured HH18 and HH19 otic vesicles and in dissected dorsal and ventral regions HH19 otic vesicles. Statistical significance was determined with the Student's t-test: \*\*\*P<0.005, versus HH18; ###P<0.005, versus dorsal region.

# TGFβ2 -induced senescence during early inner ear development

Alejandro Gibaja<sup>1\*</sup>, María R. Aburto<sup>1\*</sup>, Sara Pulido<sup>1,2</sup>, Manuel Collado<sup>3</sup>, Juan M. Hurlé<sup>4</sup>,  
Isabel Varela-Nieto<sup>1,4,5#</sup> and Marta Magariños<sup>1,2,6#</sup>

<sup>1</sup> "Alberto Sols" Biomedical Research Institute (CSIC-UAM), Madrid, Spain.

<sup>2</sup> CIBERER, Institute of Health Carlos III, Madrid, Spain.

<sup>3</sup> Instituto de Investigación Sanitaria de Santiago de Compostela, Santiago de Compostela, Spain.

<sup>4</sup> Departamento de Anatomía y Biología Celular and IDIVAL, Universidad de Cantabria. Santander, Spain.

<sup>5</sup> IdiPAZ, La Paz Hospital Institute for Health Research, Madrid, Spain.

<sup>6</sup> Department of Biology, Autonomous University of Madrid, Madrid, Spain.

\* Equal contribution

# Equal senior contribution and corresponding authors

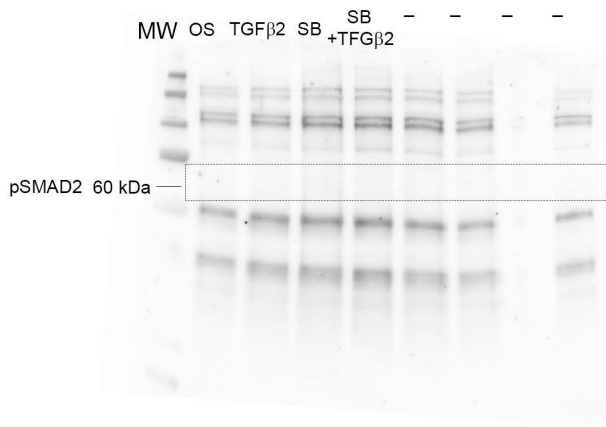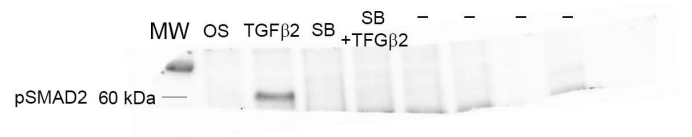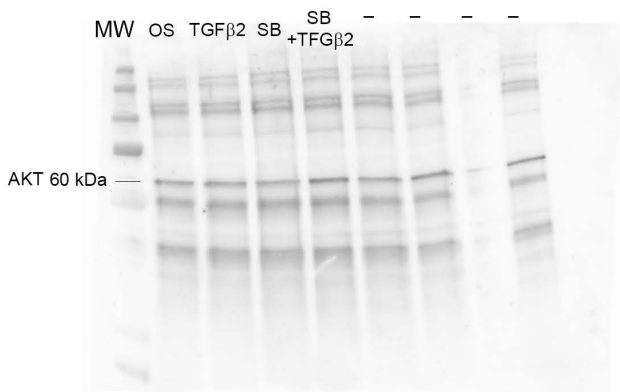

**Supplementary Information S4.** Full length blots. To improve the clarity of the information, we grouped cropped blots in Figure 4 western blottings in which we excluded conditions that were not objective of these manuscript (shown in the images as “-“).

# TGFβ2 -induced senescence during early inner ear development

Alejandro Gibaja<sup>1\*</sup>, María R. Aburto<sup>1\*</sup>, Sara Pulido<sup>1,2</sup>, Manuel Collado<sup>3</sup>, Juan M. Hurlé<sup>4</sup>,  
Isabel Varela-Nieto<sup>1,4,5#</sup> and Marta Magariños<sup>1,2,6#</sup>

<sup>1</sup> "Alberto Sols" Biomedical Research Institute (CSIC-UAM), Madrid, Spain.

<sup>2</sup> CIBERER, Institute of Health Carlos III, Madrid, Spain.

<sup>3</sup> Instituto de Investigación Sanitaria de Santiago de Compostela, Santiago de Compostela, Spain.

<sup>4</sup> Departamento de Anatomía y Biología Celular and IDIVAL, Universidad de Cantabria. Santander, Spain.

<sup>5</sup> IdiPAZ, La Paz Hospital Institute for Health Research, Madrid, Spain.

<sup>6</sup> Department of Biology, Autonomous University of Madrid, Madrid, Spain.

\* Equal contribution

# Equal senior contribution and corresponding authors

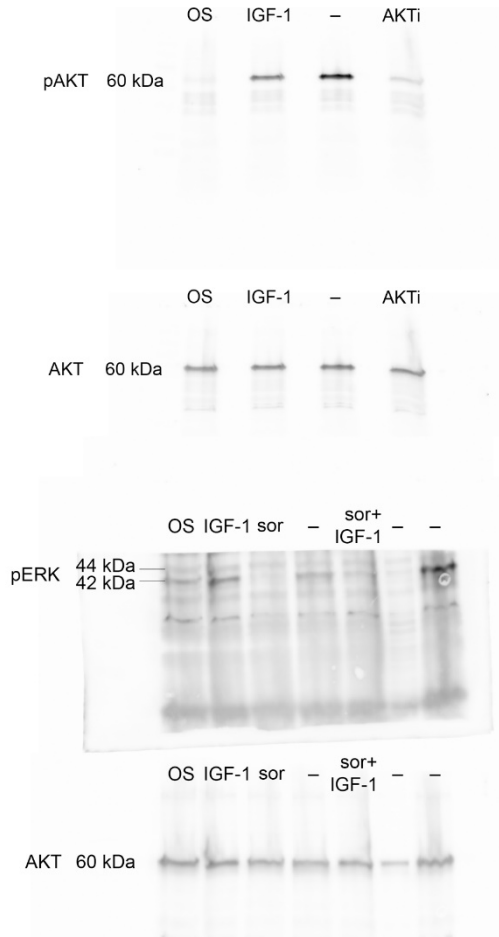

**Supplementary Information S5** Full length blots. To improve the clarity of the information, we grouped cropped blots in Figure 5 western blottings in which we excluded conditions that were not objective of these manuscript (shown in the images as “-“). The antibodies used (Supplementary Information Table S1) have been previously characterized upon the same conditions in otic vesicles cultures (references 17 and 19).

## TGFβ2-induced senescence during early inner ear development

Alejandro Gibaja<sup>1\*</sup>, María R. Aburto<sup>1\*</sup>, Sara Pulido<sup>1,2</sup>, Manuel Collado<sup>3</sup>, Juan M. Hurlé<sup>4</sup>,  
Isabel Varela-Nieto<sup>1,4,5#</sup> and Marta Magariños<sup>1,2,6#</sup>

<sup>1</sup> "Alberto Sols" Biomedical Research Institute (CSIC-UAM), Madrid, Spain.

<sup>2</sup> CIBERER, Institute of Health Carlos III, Madrid, Spain.

<sup>3</sup> Instituto de Investigación Sanitaria de Santiago de Compostela, Santiago de Compostela, Spain.

<sup>4</sup> Departamento de Anatomía y Biología Celular and IDIVAL, Universidad de Cantabria, Santander, Spain.

<sup>5</sup> IdiPAZ, La Paz Hospital Institute for Health Research, Madrid, Spain.

<sup>6</sup> Department of Biology, Autonomous University of Madrid, Madrid, Spain.

\* Equal contribution

# Equal senior contribution and corresponding authors

### Supplementary Information Table S1. Antibodies used

| <i>Antibody</i>                   | <i>Type<sup>1</sup></i> | <i>Source/Cat #</i>  | <i>Technique</i>         |
|-----------------------------------|-------------------------|----------------------|--------------------------|
| <b>Anti-Akt1/2</b>                | GP                      | Santa Cruz/sc-1619   | 1:1000 (WB)              |
| <b>Anti-pAkt<sup>Ser473</sup></b> | RbP                     | Cell Signaling/9271  | 1:1000 (WB)              |
| <b>Anti-pSMAD2</b>                | RbP                     | Cell Signaling/3101  | 1:1000 (WB), 1:200 (IHF) |
| <b>Anti-ERK MAPK</b>              | RbP                     | Cell Signaling/9102  | 1:1000 (WB)              |
| <b>Anti-pERK MAPK</b>             | RbP                     | Cell Signaling/ 9101 | 1:1000 (WB)              |
| <b>Anti-phistone 3</b>            | Rbp                     | Upstate/06-570       | 1:200 (IHF)              |

Summary of antibodies used for immunohistofluorescence (IHF) and western blotting (WB). <sup>1</sup>Antibody type: RbP, rabbit polyclonal; GP, goat polyclonal.
